# Supplementary material for: BRD4 inhibition sensitizes glioblastoma to radiotherapy by suppressing super-enhancer-driven COL1A1
Source: Research Square preprint supplement (doi:10.21203/rs.3.rs-6220409/v1), 2025-03-19
Supplement: Supplementary file 1 [file 6e6354be1675b572e4ea4e43.docx]

**Supplementary Table 1. Clinical information of patients.**

|  | **Patient 1** | | **Patient 2** | | | **Patient 3** | | **Patient 4** | | **Patient 5** | | **Patient 6** | | **Patient 7** | |
| --- | --- | --- | --- | --- | --- | --- | --- | --- | --- | --- | --- | --- | --- | --- | --- |
|  | primary | recurrent | primary | | recurrent | primary | recurrent | primary | recurrent | primary | recurrent | primary | recurrent | primary | recurrent |
| **Gender** | Male | | Female | | | Male | | Male | | Female | | Male | | Male | |
| **Age** | 46 | 48 | 49 | | 50 | 54 | 56 | 60 | 63 | 37 | 40 | 49 | 50 | 56 | 56 |
| **Pathological diagnosis** | Glioma | GBM | Glioma | | GBM | Glioma | GBM | GBM | GBM | GBM | GBM | GBM | GBM | GBM | GBM |
| **WHO grade** | Ⅱ | Ⅳ | Ⅱ | | Ⅳ | Ⅲ | Ⅳ | Ⅳ | Ⅳ | Ⅳ | Ⅳ | Ⅳ | Ⅳ | Ⅳ | Ⅳ |
| **Ki-67** | 10% (+) | 80% (+) | 50% (+) | | 30% (+) | 5% (+) | 10% (+) | 30% (+) | 20% (+) | 15% (+) | 25% (+) | 8% (+) | 14% (+) | 3% (+) | 5% (+) |
| **IDH status** | Mutant | Wild | Mutant | Wild | | Wild | Wild | Wild | Wild | Wild | Wild | Wild | Wild | Wild | Wild |
| **P53** | Mutant | Mutant | Mutant | | Mutant | Wild | Wild | Mutant | Mutant | Mutant | Mutant | Mutant | Mutant | Mutant | Mutant |
