# Supplementary material for: BRD4 inhibition sensitizes glioblastoma to radiotherapy by suppressing super-enhancer-driven COL1A1
Source: Research Square preprint supplement (doi:10.21203/rs.3.rs-6220409/v1), 2025-03-19
Supplement: Supplementary file 2 [file e45c3d1b8ecb436d6c4c3378.docx]

**Supplementary information**

**Supplementary figure legends**

**Figure S1**

**
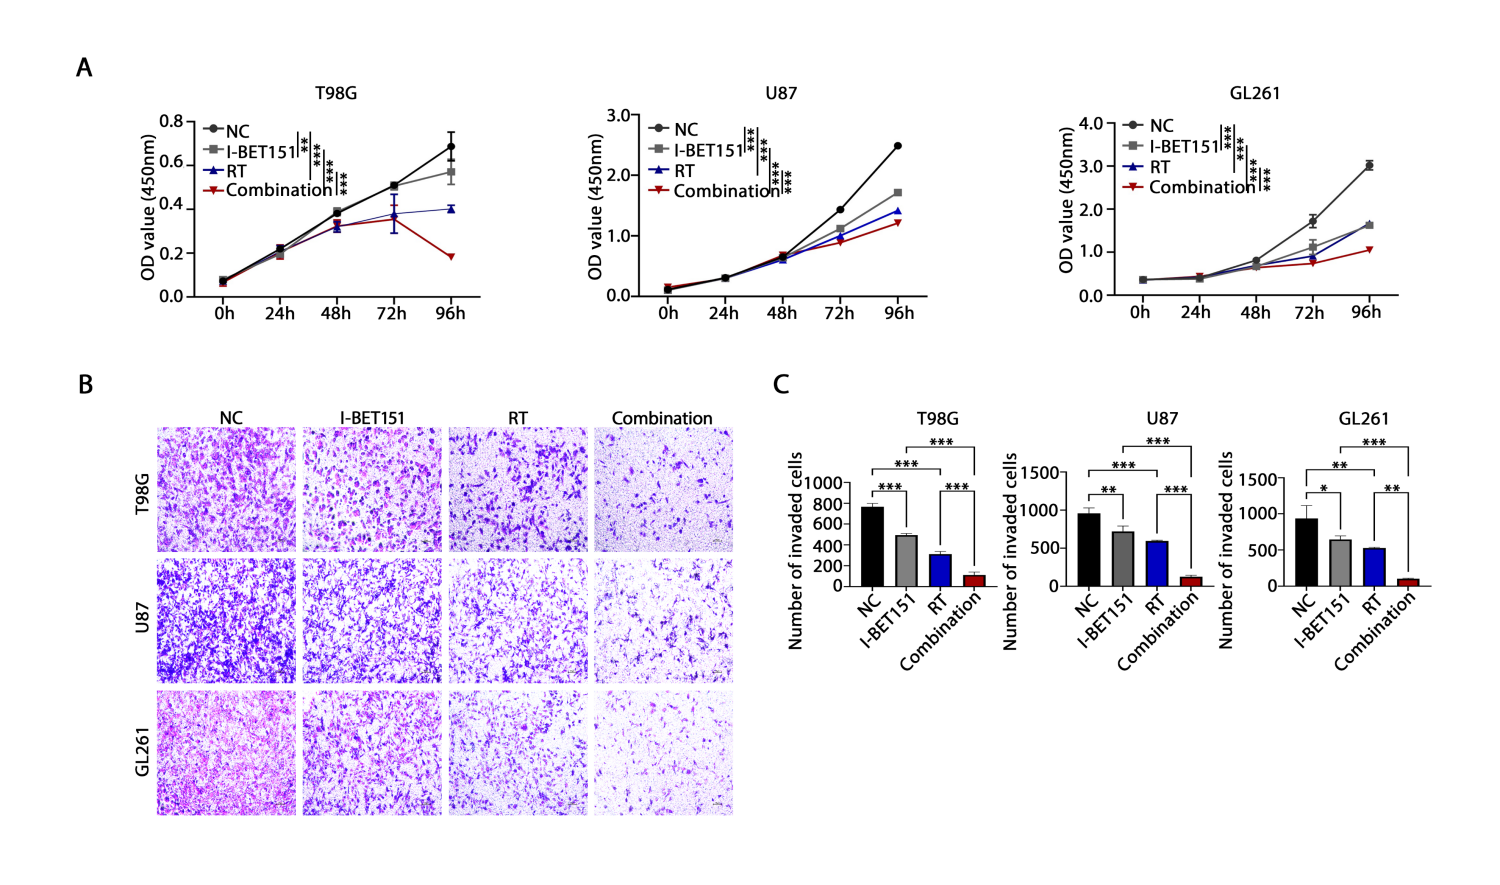
**

Human T98G, U87, and murine GL261 GBM cells were treated with NC (DMSO/sham RT), I-BET151 (1μМ), RT(5-Gy), or I-BET151 plus RT (Combination). Cell viability determined by CCK-8 assays (**A**) and and invasion potential assayed by transwell assay (**B**) and the quantification (**C**) were shown. n= 3, Data are shown as mean ± SD; ns, insignificant, **P* < 0.05, ***P* < 0.01, ****P* < 0.001.

**Figure S2**

**
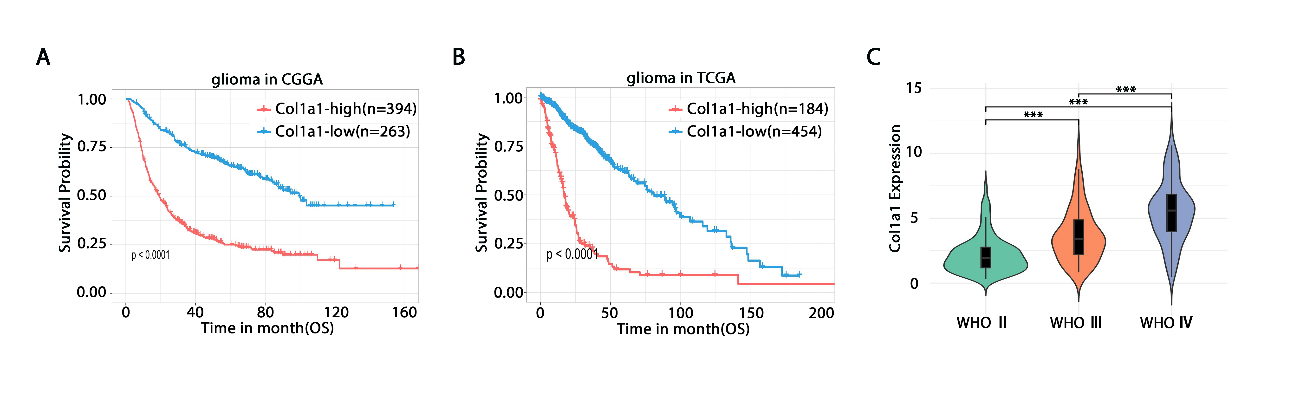
**

The OS of glioma patients in the CGGA (**A**) and TCGA data (**B**) was separated by low- and high-*Col1a1* mRNA expression levels. **C:** mRNA expression of *Col1a1* in gliomas with different WHO classifications in CGGA data, n= 321. ns, insignificant, *P < 0.05, **P < 0.01, ***P < 0.001.

**Figure S3**

**
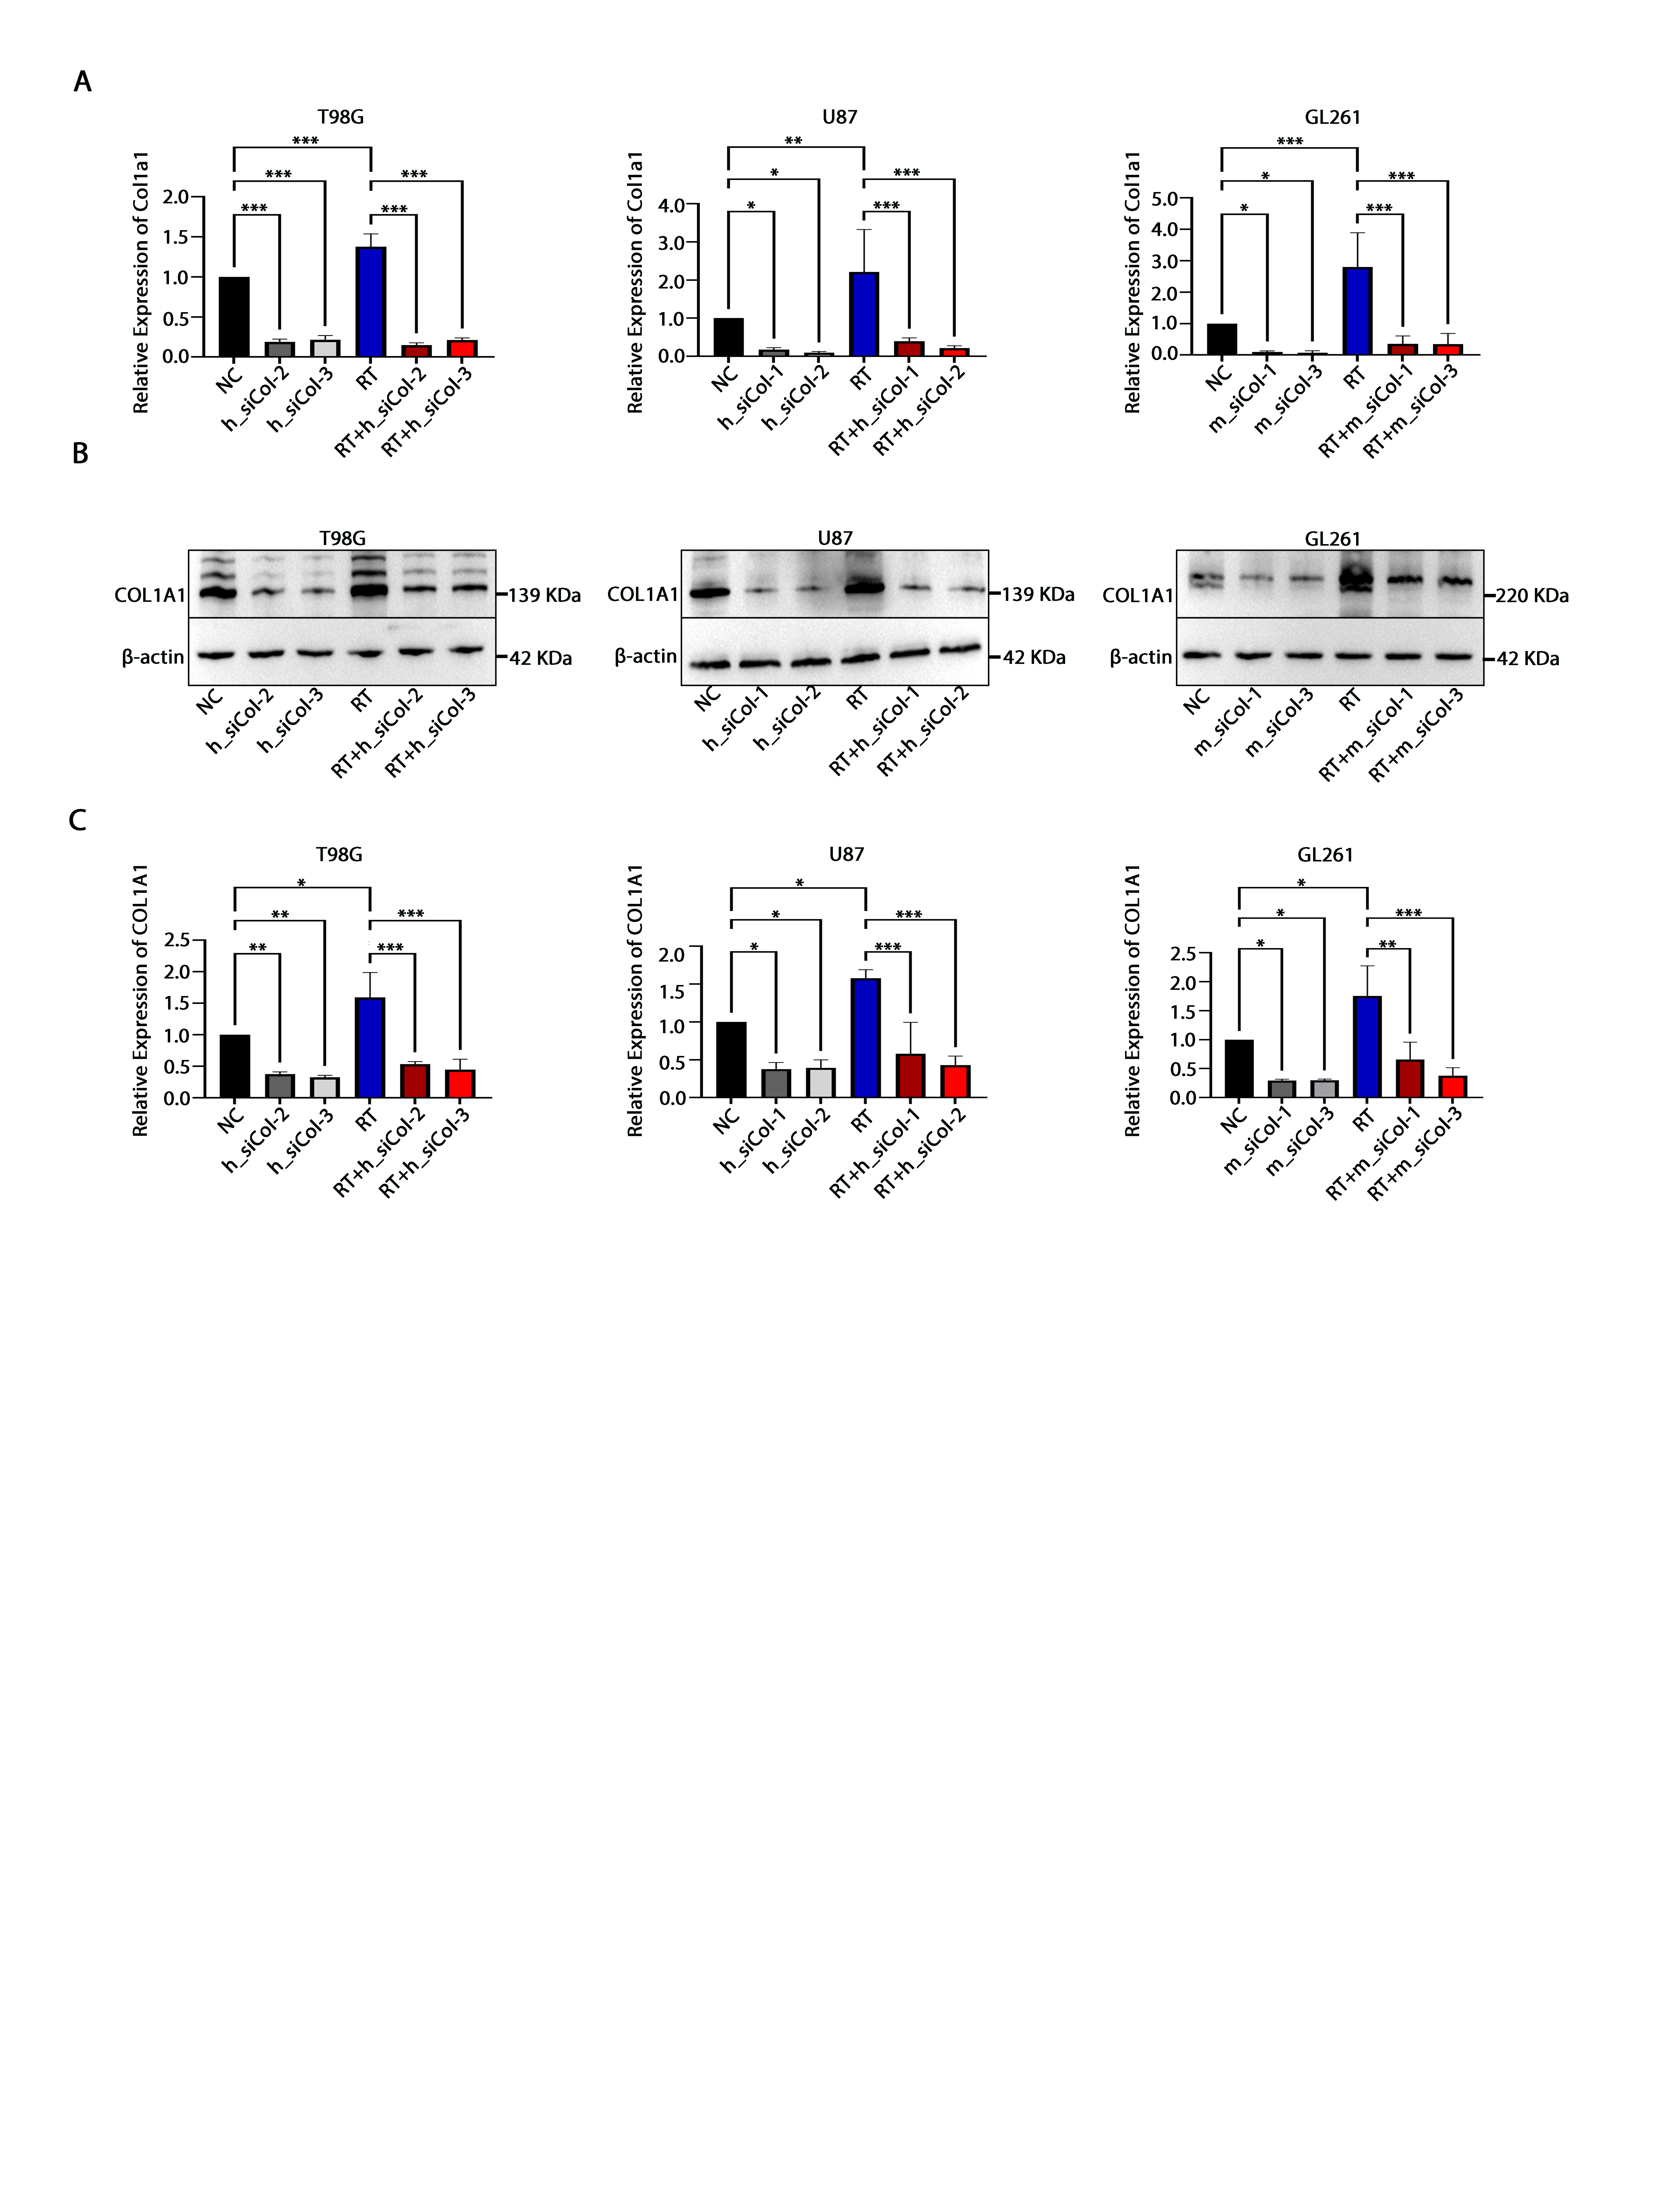
**

T98G cells transfected with h_siCol-2/3, U87 cells transfected with h_siCol-1/2, GL261 cells transfected with m_siCol-1/3, were treated with DMSO/sham RT (NC) and 5-Gy RT (RT). *Col1a1* mRNA (**A**) and protein level (**B, C**) were analyzed by qRT-PCR and Western Blot 48 hours post-treatment, respectively, n= 3. Data are shown as mean ± SD; ns, insignificant, *P < 0.05, **P < 0.01, ***P < 0.001. h_siCol, human_siCOL1A1; m_siCol: mouse_siCOL1A1.

**Material and Methods**

**Clinical specimens**

A subset of 7 pairs of human glioma surgical specimens, including 7 primary gliomas (from grade II to grade IV) and corresponding 7 recurrent GBM, were obtained from Shengjing Hospital of China Medical University. All patients had experienced treatment of RT or CRT following the first surgery when the primary tumors were diagnosed. The study was approved by the Ethics Committee of Shengjing Hospital of China Medical University.

**Animal studies**

The study was approved by the Ethics Committee of China Medical University. Four-week-old C57BL/6J mice (males) purchased from Hufukang Biotechnology Co., Ltd (Beijing, China) were kept in the Animal Department of China Medical University. For the mice subcutaneous tumor model, 1 × 106 GL261 cells in 50 µL PBS mixed with 50 µL matrigel were subcutaneously injected into C57BL/6J mice. One week later, mice with successfully established tumors with relatively uniform tumor size were randomized into 4 groups, including placebo/sham RT (10%DMSO, 100 µL, intravenous injection via the tail vein, d1-5), I-BET151 (10 mg/kg, intravenous injection via the tail vein, d1-5), RT (2 Gy × 5 fractions, d1-5, mice were shielded from RT except the tumor area), and I-BET151 (10 mg/kg before RT, intravenous injection via the tail vein, d1-5) plus RT (2 Gy × 5 fractions, d1-5). Tumor volumes were measured weekly after inoculation and tumor volume was calculated using the formula [(smallest diameter2 × widest diameter) / 2]. Upone first occurrence of tumor volume of 2000 mm³, mice were euthanized simultaneously, and the tumors were removed and weighed.

To establish syngeneic orthotopic GL261 model, C57BL/6J mice were anesthetized and fixed on a stereotaxometer. A longitudinal incision was made on the scalp, and 1.5 × 105 luciferase-expressing GL261 cells were implanted by stereotactic injection into the right striatum. One week after inoculation, BLI was performed 10 min after injection with 150 mg/kg of D-fluorescein potassium salt (Yesen, 40902ES01). After the confirmation of tumor formation, the mice were randomized into 4 groups, including placebo/sham RT (10% DMSO, 100 µL, intravenous injection via the tail vein, d1-5), I-BET151 (10 mg/kg, intravenous injection via the tail vein, d1-5), RT (2 Gy × 5 fractions, d1-5, RT was delivered to the whole brain of mice), and I-BET151 (10 mg/kg before RT, intravenous injection via the tail vein, d1-5) plus RT (2 Gy × 5 fractions, d1-5). After treatment, mice were observed daily, and their body weights were recorded. The mice were euthanized when they exhibited moribund status, including weight loss of more than 20% or exhibiting neurological deficit. Kaplan-Meier survival curves illustrated the percentage of survival with increasing time for each group.

For assessing the in vivo effects of I-BET151/RT, the subcutaneous tumors and mice brains were harvested and paraffin-embedded 48 hours after a single dose treatment or 1 week after a 5-day treatment to perform TUNEL assay, Ki67 staining, IF of COL1A1, and IF to detect immune cells.

Regimen for single-dose treatment: placebo/sham RT (10% DMSO, 100 µL, intravenous injection via the tail vein, d1), I-BET151 (10 mg/kg, intravenous injection via the tail vein, d1), RT (5 Gy, d1), and I-BET151/RT (d1).

**Cell lines and cell culture**

The cell lines used in our study, including human GBM cell lines (T98G) and murine GBM cell lines (GL261), were obtained from the American Type Culture Collection. U87 cells were purchased from the Shanghai Cell Bank of the Chinese Academy of Sciences (Shanghai, China). T98G cells were cultured in Minimal Essential medium (Cyagen Biosciences Inc., catalog #iCell-0012, Beijing, China), while GL261 and U87 cells were cultured in Dulbecco's modified Eagle's medium (Gibco, catalog #C11995500BT, Grand Island, NY, USA). Both culture mediums were supplemented with 10% fetal bovine serum (Procell, catalog #164210-50, Wuhan, China) and 1% antibiotics (penicillin/streptomycin, Gibco). Cells were maintained in a cell culture incubator at 37°C with 5% CO2. All cell lines have been authenticated by Short Tandem Repeat (STR) analysis and were passaged no more than 15 times.

**Compound and antibodies**

I-BET151 was purchased (MedChemExpress, catalog #HY-13235, Monmouth Junction NJ, USA). For in vitro studies, I-BET151 was dissolved in DMSO, and the aliquots were stored at -20℃. For in vivo studies, I-BET151 was suspended in 10% DMSO + 40% PEG300 + 50% Saline solution and was administered intravenous injection via the tail vein. Antibodies used for western blotting were BRD4 (Abcam, catalog #ab128874, Cambridge, UK), COL1A1 (Abcam, catalog #ab260043), β-actin (Proteintech, catalog #10068-1-AP, Wuhan, China), and secondary anti-rabbit IgG (Proteintech, catalog #SA00001-2). Antibodies used for IF were BRD4 (Cell Signaling Technology, catalog #83375S, Boston, Massachusetts, USA), COL1A1 (SouthernBiotech, catalog #1310-01, Birmingham, Alabama, USA), donkey anti-rabbit IgG-Alexa Fluor 488 (Proteintech, catalog #SA00013-2) and donkey anti-Goat IgG-Alexa Fluor 647 (Absin, catalog #abs20027, Shanghai, China). Antibodies used for ChIP were BRD4 (Cell Signaling Technology, catalog #83375S). Antibodies used for IHC were BRD4 (ABclonal, catalog #ab12677, Wuhan, China) and Ki67 (Proteintech, catalog #28074-1-AP).

**Western blot analysis**

Cells were lysed on ice with a 1:100 protease inhibitor mixture (Epizyme, GRF101, Shanghai, China) and RIPA buffer (Epizyme, PC101) for 10 minutes, vortexed and repeated four times, then centrifuged at 12,000 rpm for 5 minutes at 4℃. The supernatants were collected, and protein concentration was measured by the BCA method. Subsequently, denatured protein lysates in loading regent were loaded into 7.5-15% SDS-PAGE gels for electrophoretic separation. Following this process, the proteins were transferred to PVDF membranes (Epizyme, WJ002), blocked with 5% skimmed milk for 2 hours at room temperature, followed by overnight incubation with primary antibodies at 4℃. Thereafter, blots were incubated with a secondary antibody (working dilution 1: 5000) for 1 hour at room temperature. The bands were visualized using the Omni-ECL™ enhanced chemiluminescence detection kit (Epizyme, SQ101).

**Colony formation assays**

For the clonogenic assay, 500-1000 cells were seeded in six-well plates and treated with I-BET151 and RT according to their respective groups. The colony is defined to consist of at least 50 cells. The resulting colonies were washed twice with PBS, fixed in 4% paraformaldehyde for 25 minutes, and stained with crystal violet for 30 minutes. After rinsing with water, the plates were dried and photographed.

**Immunofluorescence (IF) staining**

Cells were fixed in 4% paraformaldehyde for 20 minutes and then permeabilized with 0.5% Triton X-100 (Beyotime, P0096, Shanghai, China) at room temperature for 20 minutes. The cells were blocked with 10% goat serum (Beyotime, C0265) for 2 hours and then incubated with primary antibodies overnight at 4℃. After washing, the cells were incubated with fluorescent secondary antibodies at room temperature for 1 hour. Afterward, the cells were counterstained with DAPI (Beyotime, C1005) and mounted with an anti-fade mounting medium (Beyotime, P0126). Images were captured using a fluorescence microscope attached with a CCD camera.

Tissue sections were dewaxed, put into boiling antigen retrieval solution on high heat for 20 min, and washed in PBST twice for 10 minutes each. Then, the tissue sections were permeabilized with 0.5% Triton X-100 for 30 minutes at room temperature. The tissue sections were blocked with 10 % goat serum for 1 hour and incubated overnight with primary antibodies at 4°C. After washing, the sections were incubated with fluorescent secondary antibodies for 1 hour. Sections were stained with DAPI (Beyotime, C1005) and then background deconditioned for 1 hour with tissue spontaneous fluorescent quencher (Applygen, C1212, Beijing, China). Afterward, the sections were mounted with an anti-fade seal (Beyotime, P0126). Images were captured using a fluorescence microscope.

**Flow cytometry**

For analysis of apoptosis, cells were trypsinized 72 hours after RT. Resuspended the cells using binding buffer solution containing annexin V-FITC and PI (Dojindo, AD10, Kyushu Island, Japan), and then incubated for 15 minutes at 4℃ in the dark. Finally, the incubated cell suspension was diluted fivefold with binding buffer solution and analyzed using NovoCyte flow cytometer (Aglient, Santa Clara, California, USA). Results were analyzed using FLOW-Jo software.

**EDU assay**

1 × 105 cells were seeded into each well of a 6-well plate, supplemented with EDU medium (Beyotime, C0071S), and incubated for 2 hours at 37℃. The medium was discarded and fixed for 15 minutes at room temperature and permeabilized with 0.5% Triton X-100 for 15 minutes. The click reaction solution was prepared, incubated for 30 minutes, and washed. The cells were stained for Hoechst33342 for 10 minutes at room temperature in the dark and then washed again. Samples were observed using fluorescence microscopy according to the manufacturer's instructions. This experiment was repeated three times.

**TUNEL assay**

According to the instructions, the tissues were stained using the One-Step TUNEL Apoptosis Assay Kit (Beyotime, C1090). Images were captured using a fluorescence microscope.

**CCK-8 assay**

GL261, U87 and T98G cells were plated in 96-well plates at a density of 2000 cells per well and cultured overnight. The absorbance (OD) at 450 nm was measured using a microplate reader at 0 hour, 24 hours, 48 hours, 72 hours, and 96 hours after treatment. Before the measurement, 10 μL of reagent (NCM Biotec, C6005, Suzhou, China) was added to the wells and then incubated at 37℃ for 2 hours. Each time point was tested in triplicate, and a line graph of the OD values was plotted.

**Transwell invasion assay**

Corning ® invasion chambers were placed in 24-well plates containing 10% FBS complete culture medium. Matrigel ® (Corning, 356234, Corning, New York, USA) mixed with serum-free medium was coated on the upper chamber surface of the basement membrane of the transwell. 3×104 cells, treated as indicated, were plated in the upper chamber using serum-free medium. After 48 hours of incubation, cells were fixed on basement membranes with 4 % paraformaldehyde for 40 minutes, stained with crystal violet solution for 15 minutes, and photographed for comparison.

**IHC staining**

Formalin-fixed paraffin-embedded (FFPE) tissues were cut into 4-micrometer sections and mounted onto glass slides coated with adhesive. After deparaffinization and antigen retrieval, the tissues were stained with antibodies. The slides were then incubated with primary antibodies overnight at 4℃. Normal serum was used as a negative control. The slides were then observed under a microscope and photographed. The H-score was calculated from the intensity score * quantity score. For the intensity score, 0, 1, 2, and 3 represent negative, weak, medium, and strong, respectively. Quantitative scores were determined by the proportion of stained cells, where 0, 1, 2, 3, and 4 represent < 10%, 10% - 25%, 25% - 50%, 50% - 75%, and > 75%, respectively.

**RNA-sequencing and data analysis**

According to the standard procedure, total RNA was extracted from GL261 cells using an RNA kit (Foregene, 2.0-1801, Chengdu, China), and mRNA libraries were prepared. RNA-seq was performed on the Illumina NovaSeq X plus by Novogene (Beijing, China). Reads met quality were aligned to the mouse reference genome (mm10) using HISAT2 (v2.0.5). Differentially expressed genes (DEGs) were identified using DESeq2 (v1.20.0), applying a false discovery rate (FDR) < 0.05. Additionally, GO and KEGG pathway enrichment analysis for DEGs was performed using the R package “clusterProfiler”.

**ChIP-sequencing and data analysis**

The ChIP was conducted following the manufacturer’s instructions. Both ChIP and input libraries were prepared following the manufacturer's protocol, and sequencing was conducted by Illumina NovaSeq X plus by Novogene. Data analysis was performed on the Illumina HiSeq × 10/Nova platform. The raw sequencing reads that passed quality were aligned to a mouse reference genome using Bowtie2. For peak calling in the ChIP-seq data, we utilized the Model-Based Analysis of ChIP-seq (MACs) method. Bam files were converted to bigwig files using deepTools, and visualization was done using the Integrative Genomics Viewer. H3K27ac ChIP-seq data was employed to identify SEs using the Rank Ordering of Super-enhancers (ROSE) algorithm (version 2). Enhancer regions were plotted in ascending order based on the H3K27ac ChIP-seq signal, with those surpassing the inflection point of the signal curve designated as SEs.

**RNA Extraction and Quantitative Real‐Time PCR (qRT-PCR)**

Total RNA was extracted from tissues and cell lines using the RNA kit (Foregene, 2.0-1801). cDNA was synthesized using the Thermo Scientific kit (Thermo Scientific, 2594504, Waltham, Massachusetts, USA). qRT-PCR analysis was conducted using the 2Ⅹ SYBR Green qPCR Master Mix (Selleck, B21402, Houston, Texas, USA). Relative RNA expression levels were determined using the cobas® z480 real-time fluorescence quantitative PCR system (Cobas, 51546, Basel, Switzerland). The relative mRNA expressions of the target genes were normalized to the level of β-actin mRNA using the 2-ΔΔCt method. The primers used are listed as follows: *Col1a1* (Mouse source): F, GACAGGCGAACAAGGTGACAGAG and R, CAGGAGAACCAGGAGAACCAGGAG; *Col1a1* (Human source): F, TGGCAAAGAAGGCGGCAAAG and R, AGGAGCACCAGCAGGACCATC.

**ChIP-qPCR**

ChIP was performed using the ChIP assay kit (Thermo Fisher, 26157) according to the manufacturer's instructions. 4 × 106 cells were cross-linked with 1% formaldehyde for 10 minutes at room temperature and then neutralized with glycine for 5 minutes. Cells were rinsed for three times with ice-cold PBS. Cells were resuspended in membrane extraction buffer and the supernatant was discarded after centrifuged at 9000 x g for 3 minutes. Chromatin was digested with Micrococcal Nuclease and sonicated to obtain appropriate DNA fragments. Immunoprecipitation was performed using anti-BRD4 (CST, 83375S, 1:50 dilutions) or control IgG (CST, 2729S, 1:50 dilutions). After immunoprecipitation, protein A/G magnetic beads were added and incubated for an additional 2 hour at 4℃. Then, the eluted protein-chromatin complex was obtained by eluting with an elution buffer. Finally, DNA was purified for qPCR. All the qPCR reactions were carried out in triplicate. Resulting data are presented as a percentage of input DNA. The primers of the *Col1a1*-SE region used are listed as follows: SE-1: F, TGTGCTACCCGCCAACTTCA and R, TGTCCATCAGCACCAGGGTTTC; SE-2: F, CTCTGAAGGTCCCCAGGGTG and R, AGAGAAAGGAGGGTGAGTGAAA.

**Small interfering RNA (siRNA) transfection**

siRNA transfection was performed using RNA-Fit transfection reagent (HanBio, Shanghai, China), following the manufacturer's instructions. Cells were seeded into six-well plates, and groups were determined. When adherent cells reached 50% density, small interfering RNA (siRNA) transfection was performed. The siRNA duplexes were diluted in serum-free medium, added RNA-Fit, and immediately vortexed for 10 seconds to mix, incubated for 10 minutes at room temperature, then added to the complete medium containing serum each well, and the cell plate was gently shaken to mix evenly. After transfection, the plates were incubated at 37℃, 5% CO2 for 24 to 72 hours later.

**Statistical analysis**

All the experiments were repeated at least three times, and data are presented as mean ± standard deviation (SD). The data were analyzed using GraphPad Prism software (GraphPad Prism 10) and SPSS. Pairwise comparisons were statistically analyzed using the student’s t-test. One-way analysis of variance (ANOVA) was used for all datasets with three or more groups, followed by Tukey's multiple comparison test to assess differences between groups. Survival curves were generated by the Kaplan-Meier method, and differences between survival curves were analyzed by the Mantel-Cox test. *P*-value < 0.05 was accepted as statistically significant (* *P* < 0.05; ** *P* < 0.01; *** *P* < 0.001).
